# Supplementary material for: Transcriptomic Insights into the Enhanced Aroma of Guangdong Oolong Dry Tea (Camellia sinensis cv. Yashixiang Dancong) in Winter
Source: MDPI journal article supplement (doi:10.3390/foods13010160), 2024-01-02
Supplement: s1 [file s1]

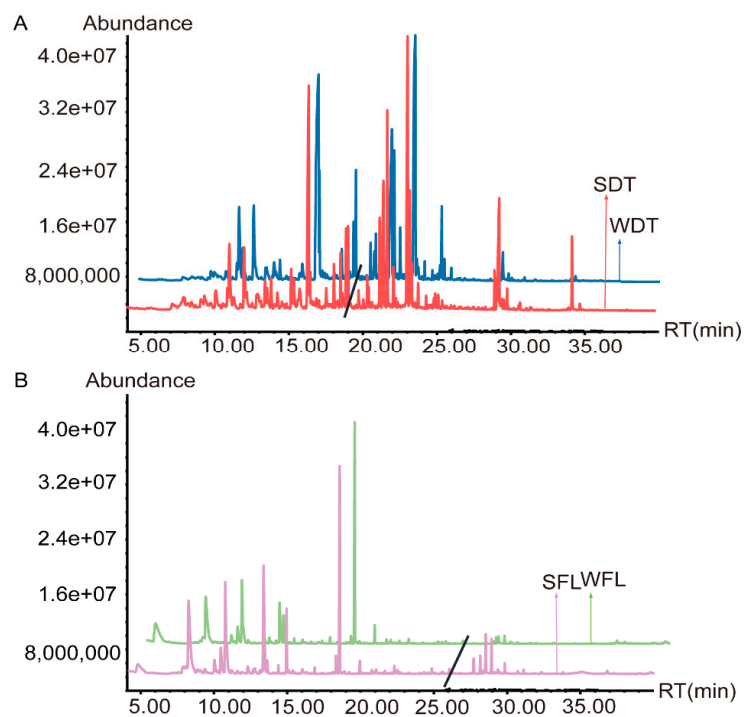

**Fig. S1.** GC-MS spectra of compounds in DT and FL. (A) GC-MS spectra of compounds in SDT and WDT. (B) GC-MS spectra of compounds in SFL and WFL.

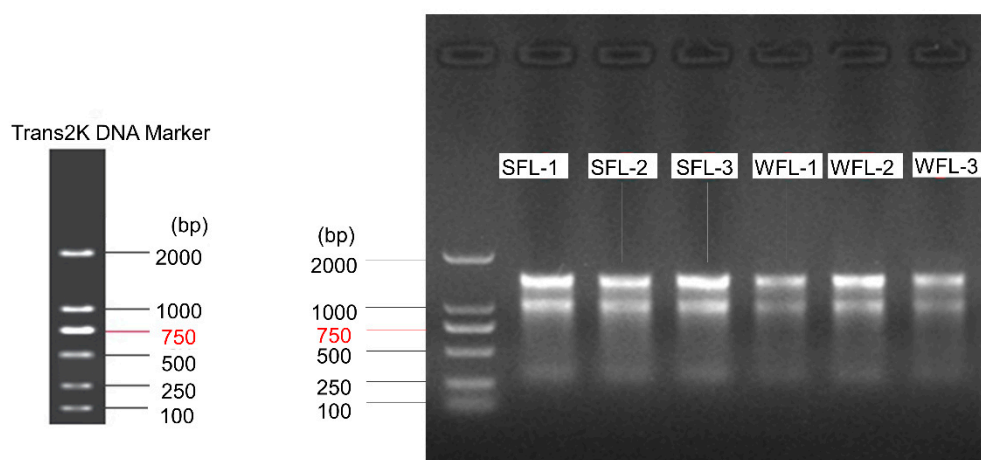

**Fig. S2.** Agarose gel electrophoresis of RNA from SFL and WFL.

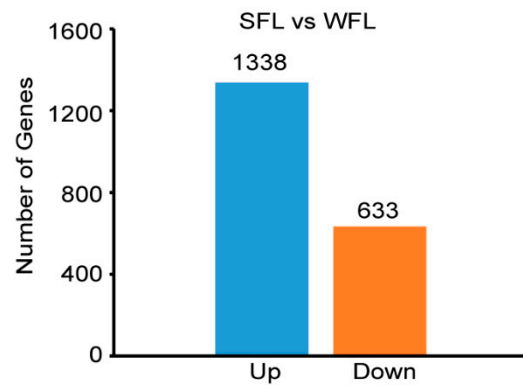

**Fig. S3.** Differentially expressed genes in SFL and WFL.

**Table S1.** Primer table for fluorescence quantitative PCR validation.

| Unigene ID       | Primer sequences (5'-3')      | Primer length (bp) |
|------------------|-------------------------------|--------------------|
| <i>CsActin</i>   | F: GCCATATTTGATTGGAATGG       | 20                 |
|                  | R: GGTGCCACAACCTTGATCTT       | 20                 |
| <i>CsLMS</i>     | F: GTTGACAGATGGGATGTG         | 18                 |
|                  | R: CAATGTTGGCTTGATCCC         | 18                 |
| <i>CsGDS</i>     | F: GGTACCGGAGGTCACTCG         | 18                 |
|                  | R: TGTCATCATGGTGATCAT         | 18                 |
| <i>CsLIS/NES</i> | F: GCAAGAAGGGTACAATGTGCCCCGCG | 25                 |
|                  | R: CTGCGGCTTGATCAAGAATGTCTTC  | 25                 |
| <i>CsNES</i>     | F: AGGCATTGATTACCACTTCCGGGAG  | 25                 |
|                  | R: GCACATTGTAGCCTTGTTGCCTCAA  | 25                 |
| <i>CsHDMI</i>    | F: GGGGTTTGATCCAGACAG         | 18                 |
|                  | R: TGAAGTGCTCGTTGAGGT         | 18                 |
| <i>CsAFS</i>     | F: TGTCAACACAGCTAGAGTGGC      | 21                 |
|                  | R: AGCATAGAGAGGACTTGGGC       | 21                 |

**Table S2.** Quality of reads for 6 RNA-Seq samples.

| Sample       | RawData (bp)  | CleanData (bp) | Q20 (%)                   | Q30 (%)                   | N (%)             | GC (%)                    |
|--------------|---------------|----------------|---------------------------|---------------------------|-------------------|---------------------------|
| <b>SFL-1</b> | 7,983,845,400 | 7,922,126,134  | 7,749,669,496<br>(97.82%) | 7,420,775,626<br>(93.67%) | 45,172<br>(0.00%) | 3,580,115,679<br>(45.19%) |
| <b>SFL-2</b> | 8,568,089,700 | 8,496,049,913  | 8,318,335,734<br>(97.91%) | 7,976,296,814<br>(93.88%) | 48,509<br>(0.00%) | 3,852,622,084<br>(45.35%) |
| <b>SFL-3</b> | 8,621,056,200 | 8,545,617,746  | 8,371,429,568<br>(97.96%) | 8,033,166,400<br>(94.00%) | 48,787<br>(0.00%) | 3,857,775,196<br>(45.14%) |
| <b>WFL-1</b> | 8,386,216,500 | 8,323,360,731  | 8,164,355,999<br>(98.09%) | 7,846,314,729<br>(94.27%) | 47,005<br>(0.00%) | 3,702,275,001<br>(44.48%) |
| <b>WFL-2</b> | 7,352,164,800 | 7,297,175,748  | 7,145,505,785<br>(97.92%) | 6,849,630,299<br>(93.87%) | 31,880<br>(0.00%) | 3,261,275,334<br>(44.69%) |
| <b>WFL-3</b> | 8,146,940,700 | 8,071,044,551  | 7,894,668,388<br>(97.81%) | 7,559,522,773<br>(93.66%) | 30,662<br>(0.00%) | 3,674,170,692<br>(45.52%) |

**Table S3.** The volatile components of FYS, FYW, YDS and YDW.

| No. | Volatile Compounds                               | SFL (ng/g)   | WFL (ng/g)  | SDT (ng/g)     | WDT (ng/g)     | RI (cal)/RI (ref) | Qualitative method |
|-----|--------------------------------------------------|--------------|-------------|----------------|----------------|-------------------|--------------------|
| 1   | Benzyl alcohol                                   | 26.28±3.52   | -           | 229.9±62.75    | 270.91±23.67   | 1030/1034         | MS, RI             |
| 2   | Linalool                                         | 75.53±45.7   | -           | 855.31±145.35  | 1015.55±167.78 | 1099/1098         | MS, RI             |
| 3   | Linalool oxide I                                 | 94.21±20.47  | 40.21±5.55  | 375.56±58.16   | 190.85±21.95   | 1069/1071         | MS, RI             |
| 4   | Linalool oxide II                                | 170.41±39.04 | 77.39±11.90 | 96.29±17.11    | 81.74±8.21     | 1085/1086         | MS, RI             |
| 5   | Hotrienol                                        | -            | -           | 282.49±47.84   | 772.76±62.71   | 1107/1107         | MS, RI             |
| 6   | Geraniol                                         | 164.95±27.71 | -           | 324.55±54.96   | 146.42±0.00    | 1248/1255         | MS, RI             |
| 7   | ( <i>E</i> )-2,6-Dimethylocta-3,7-diene-2,6-diol | -            | -           | 343.36±57.75   | 314.67±23.39   | 1184/1191         | MS, RI             |
| 8   | $\alpha$ -Terpineol                              | 14.71±1.77   | 6.48±1.40   | -              | -              | 1186/1185         | MS, RI             |
| 9   | ( <i>E</i> )-Nerolidol                           | 8.55±2.35    | 2.87±0.56   | 2190.78±353.32 | 4270.54±717.16 | 1562/1565         | MS, RI             |
| 10  | Cedrol                                           | 1.28±0.47    | -           | 23.19±3.83     | 28.38±5.11     | 1598/1596         | MS, RI             |
| 11  | Muurolo-4,10(14)-dien-1 $\beta$ -ol              | 1.40±0.17    | 1.36±0.00   | 16.20±0.00     | -              | 1626/1635         | MS, RI             |
| 12  | ( <i>E</i> , <i>E</i> )-Farnesol                 | -            | -           | 20.08±3.80     | 23.43±5.28     | 1713/1722         | MS, RI             |
| 13  | Isophytol                                        | -            | -           | 10.09±3.53     | -              | 2035/1950         | MS, RI             |
| 14  | Phytol                                           | -            | -           | 279.91±54.15   | 29.86±13.91    | 2101/2105         | MS, RI             |
| 15  | $\tau$ -Muurolol                                 | 5.27±1.57    | 7.07±1.24   | 87.58±14.60    | 147.25±28.13   | 1638/1640         | MS, RI             |
| 16  | $\alpha$ -Cadinol                                | 2.3±0.63     | 4.39±0.89   | 95.42±23.28    | 165.56±29.68   | 1650/1650         | MS, RI             |
| 17  | <i>n</i> -Nonadecanol-1                          | -            | -           | 8.45±4.09      | -              | 2241/2172         | MS, RI             |
| 18  | <i>D</i> -Limonene                               | 37.54±5.82   | 13.28±3.11  | -              | -              | 1025/1028         | MS, RI             |
| 19  | $\beta$ -Ocimene                                 | 34.55±4.63   | 9.87±2.78   | -              | -              | 1043/1044         | MS, RI             |
| 20  | $\gamma$ -Terpinene                              | 7.66±1.07    | -           | -              | -              | 1,054/1054        | MS, RI             |
| 21  | allo-Ocimene                                     | 19.37±2.87   | 5.45±1.60   | -              | 55.8±14.23     | 1124/1131         | MS, RI             |
| 22  | 1,3,5,8-Undecatetraene                           | 11.8±2.02    | 9.57±2.10   | -              | 50.55±0.00     | 1180/-            | MS                 |
| 23  | $\alpha$ -Cubebene                               | -            | -           | 33.28±0.00     | 50.14±8.72     | 1345/1345         | MS, RI             |
| 24  | Copaene                                          | 2.82±0.21    | 3.07±0.47   | 38.02±5.87     | 60.45±19.80    | 1371/1367         | MS, RI             |
| 25  | $\beta$ -Cubebene                                | -            | -           | -              | 24.95±5.32     | 1385/1388         | MS, RI             |
| 26  | <i>cis</i> - $\alpha$ -Bergamotene               | -            | -           | -              | 30.27±7.11     | 1412/1415         | MS, RI             |
| 27  | Caryophyllene                                    | 5.82±1.23    | 3.98±0.6    | 49.61±8.22     | 44.9±14.28     | 1415/1417         | MS, RI             |
| 28  | <i>cis</i> -Thujopsene                           | 1.05±0.16    | -           | -              | 220.98±0.00    | 1440/1441         | MS, RI             |
| 29  | ( <i>Z</i> )- $\beta$ -Farnesene                 | 2.93±0.62    | 1.4±0.26    | 109.06±14.79   | 266.73±43.39   | 1449/1445         | MS, RI             |

Table S3. (continue)

| No. | Volatile Compounds                      | SFL (ng/g)  | WFL (ng/g)   | SDT (ng/g)   | WDT (ng/g)     | RI (cal)/RI (ref) | Qualitative method |
|-----|-----------------------------------------|-------------|--------------|--------------|----------------|-------------------|--------------------|
| 30  | Aromandendrene                          | 1.02±0.22   | 1.44±0.40    | 16.1±2.71    | 36.82±23.13    | 1457/1457         | MS, RI             |
| 31  | $\gamma$ -Muurolene                     | 1.11±0.15   | 1.55±0.56    | 35.09±6.55   | 37.3±9.30      | 1472/1474         | MS, RI             |
| 32  | $\alpha$ -Muurolene                     | 2.2±0.18    | 3.17±0.71    | 43.95±6.58   | 3390.27±222.31 | 1495/1497         | MS, RI             |
| 33  | $\gamma$ -Cadinene                      | 1.73±0.25   | 3.08±1.41    | 30.59±4.87   | 47.12±12.72    | 1510/1511         | MS, RI             |
| 34  | $\alpha$ -Cadinene                      | 1.41±0.15   | 1.75±0.27    | 47.69±6.82   | 50.89±1.63     | 1533/1533         | MS, RI             |
| 35  | ( <i>E</i> )- $\alpha$ -Bisabolene      | -           | -            | -            | 34.98±6.04     | 1536/1540         | MS, RI             |
| 36  | $\alpha$ -Calacorene                    | 2.13±0.28   | 1.99±0.49    | 34.95±10.27  | 33.51±6.84     | 1538/1542         | MS, RI             |
| 37  | Cadalene                                | 2.48±0.34   | 1.98±0.37    | 25.88±5.45   | 120.07±8.90    | 1672/1674         | MS, RI             |
| 38  | (+)- $\alpha$ -curcumene                | 0.98±0.26   | -            | 30.77±4.75   | 45.55±7.32     | 1477/1481         | MS, RI             |
| 39  | 8-Heptadecene                           | 0.76±0.23   | 0.73±0.06    | 13.30±4.26   | 19.35±2.84     | 1668/1670         | MS, RI             |
| 40  | 2,2',5,5'-tetramethyl-1,1'-Biphenyl     | -           | -            | -            | 19.62±0.00     | 1702/1668         | MS, RI             |
| 41  | 1-Octadecene                            | -           | -            | 9.42±2.21    | 12.15±2.62     | 1781/1788         | MS, RI             |
| 42  | Neophytadiene                           | 3.70±1.94   | -            | 199.22±36.99 | 26.27±6.90     | 1830/1837         | MS, RI             |
| 43  | $\beta$ -Cyclocitral                    | 4.91±1.39   | 5.2±1.41     | -            | 80.91±16.72    | 1216/1218         | MS, RI             |
| 44  | ( <i>E</i> )-2-Decenal                  | 9.73±2.7    | 5.56±1.70    | -            | -              | 1256/1260         | MS, RI             |
| 45  | Dodecanal                               | 2.35±0.26   | 4.76±1.69    | 57.19±9.20   | 82.75±1.77     | 1400/1405         | MS, RI             |
| 46  | Benzaldehyde                            | 13.21±1.90  | 13.57±1.09   | 124.38±20.73 | 157.7±12.69    | 959/961           | MS, RI             |
| 47  | Benzeneacetaldehyde                     | -           | -            | 311.63±54.32 | 231.77±44.22   | 1038/1042         | MS, RI             |
| 48  | ( <i>E</i> )-2-Hexenal                  | 92.52±17.12 | 293.85±36.13 | -            | -              | -                 | MS, RI             |
| 49  | ( <i>E</i> , <i>E</i> )-2,4-Heptadienal | -           | -            | 157.87±21.51 | 109.15±12.93   | 1007/1007         | MS, RI             |
| 50  | Decanal                                 | 31.13±15.11 | 44.98±17.13  | 272.31±77.63 | 177.14±57.21   | 1199/1206         | MS, RI             |
| 51  | ( <i>E</i> , <i>E</i> )-2,4-Nonadienal  | -           | -            | 40.48±13.10  | -              | 1208/1199         | MS, RI             |
| 52  | 2-butyl-2-Octenal                       | -           | -            | 32.85±0.89   | -              | 1367/1372         | MS, RI             |
| 53  | 2-Dodecenal                             | -           | -            | 50.98±13.26  | -              | 1458/-            | MS                 |
| 54  | Tetradecanal                            | -           | -            | 15.56±2.39   | 17.17±0.89     | 1603/1606         | MS, RI             |
| 55  | Benzoic acid hexyl ester                | -           | 1.08±0.00    | 244.06±42.26 | 76.67±18.27    | 1572/1576         | MS, RI             |

Table S3. (continue)

| No. | Volatile Compounds               | SFL (ng/g)   | WFL (ng/g)   | SDT (ng/g)     | WDT (ng/g)     | RI (cal)/RI (ref) | Qualitative method |
|-----|----------------------------------|--------------|--------------|----------------|----------------|-------------------|--------------------|
| 56  | Diisobutyl phthalate             | 20.54±17.59  | 3.09±0.21    | 14.45±6.47     | 14.01±8.57     | 1918/1954         | MS, RI             |
| 57  | Methyl anthranilate              | 0.91±0.47    | 0.73±0.12    | 194.65±34.28   | 75.76±65.02    | 1336/1338         | MS, RI             |
| 58  | $\beta$ -Phenylethyl butyrate    | -            | 2.05±0       | 61.89±9.42     | 195.03±44.61   | 1435/1440         | MS, RI             |
| 59  | (Z)-3-Hexenyl salicylate         | -            | -            | 92.91±20.80    | -              | 1662/1670         | MS, RI             |
| 60  | Methyl jasmonate                 | 0.57±0.11    | 0.94±0.18    | 85.83±12.93    | 498.23±51.81   | 1642/1644         | MS, RI             |
| 61  | Methyl salicylate                | 515.85±63.34 | 156.66±22.33 | 272.24±45.57   | 119.90±21.60   | 1189/1187         | MS, RI             |
| 62  | Hexanoic acid, hexyl ester       | 4.07±0.60    | -            | 208.30±77.64   | 74.85±22.24    | 1378/1383         | MS, RI             |
| 63  | <i>cis</i> -3-Hexenyl benzoate   | -            | -            | 651.49±107.17  | -              | 1565/1568         | MS, RI             |
| 64  | Isopropyl myristate              | -            | -            | 3.89±0.53      | 5.92±2.58      | 1815/1823         | MS, RI             |
| 65  | Hexadecanoic acid, methyl ester  | 7.49±5.93    | 4.54±0.78    | 36.77±6.24     | 22.16±5.57     | 1954/1939         | MS, RI             |
| 66  | Isopropyl palmitate              | 0.75±0.10    | -            | -              | 6.71±0.65      | 2042/2023         | MS, RI             |
| 67  | Butylated Hydroxytoluene         | 1.84±0.51    | -            | 51.55±10.11    | 52.8±13.66     | 1506/1513         | MS, RI             |
| 68  | 2,4-Di- <i>tert</i> -butylphenol | 0.98±0.00    | 6.00±1.39    | -              | -              | 1505/1513         | MS, RI             |
| 69  | Indole                           | 19.16±1.92   | 9.48±1.83    | 3020.24±358.27 | 5453.51±429.69 | 1291/1293         | MS, RI             |
| 70  | Benzyl nitrile                   | 10.26±1.16   | 6.2±1.46     | 775.8±130.11   | 1335.85±44.98  | 1134/1143         | MS, RI             |
| 71  | (2-nitroethyl)-Benzene           | -            | 3.23±0.57    | 166.43±61.59   | 628.75±81.65   | 1298/1305         | MS, RI             |
| 72  | Jasmine lactone                  | -            | -            | 1441.97±209.13 | -              | 1490/1486         | MS, RI             |
| 73  | Dihydroactinidiolide             | 1.49±0.27    | 1.54±0.34    | 88.56±19.02    | 56.49±7.25     | 1526/1525         | MS, RI             |
| 74  | Hexanoic acid                    | 56.7±7.69    | 16.42±3.31   | -              | 202.48±17.54   | 987/981           | MS, RI             |
| 75  | Geranic acid                     | -            | -            | 59.74±13.30    | -              | 1349/1355         | MS, RI             |
| 76  | Octanoic acid                    | -            | -            | 83.05±5.47     | 37.64±6.00     | 1172/1175         | MS, RI             |
| 77  | <i>n</i> -Decanoic acid          | -            | 1.76±0.00    | 39.55±6.45     | -              | 1362/1368         | MS, RI             |
| 78  | Myristic acid                    | -            | -            | 20.04±6.83     | 15.21±8.90     | 1751/1759         | MS, RI             |
| 79  | <i>n</i> -Hexadecanoic acid      | -            | -            | 13.15±5.48     | 5.27±1.78      | 2085/1999         | MS, RI             |

**Table S3.** (continue)

| No. | Volatile Compounds                 | SFL (ng/g)     | WFL (ng/g)     | SDT (ng/g)        | WDT (ng/g)        | RI (cal)/RI (ref) | Qualitative method |
|-----|------------------------------------|----------------|----------------|-------------------|-------------------|-------------------|--------------------|
| 80  | ( <i>Z</i> )-Jasmone               | 2.41±0.44      | 5.97±1.34      | 469.55±69.20      | 733.82±87.91      | 1394/1396         | MS, RI             |
| 81  | $\alpha$ -Ionone                   | 0.64±0.25      | 1.29±0.49      | 121.14±18.50      | 21.53±2.93        | 1421/1427         | MS, RI             |
| 82  | <i>trans</i> - $\beta$ -Ionone     | 8.64±2.03      | 9.73±1.54      | 482.04±76.62      | 255.8±49.25       | 1481/1485         | MS, RI             |
| 83  | 6,10-Dimethyl-5,9-undecadien-2-one | 14.38±6.47     | 20.74±6.68     | 221.29±41.24      | -                 | 1445/1446         | MS, RI             |
| 84  | Hexahydrofarnesyl acetone          | 3.20±2.88      | 5.02±2.36      | 141.23±50.44      | 52.64±18.31       | 1835/1838         | MS, RI             |
|     | Total                              | 1622.20±316.27 | 1120.32±140.81 | 16,080.00±2682.96 | 22,930.00±2687.58 |                   |                    |

**Table S4.** Terpene index of SFL, WFL, SDT and WDT.

|                    | SFL    | WFL  | SDT    | WDT     |
|--------------------|--------|------|--------|---------|
| linalool(ng/g)     | 75.53  | 0.00 | 855.31 | 1015.55 |
| geraniol(ng/g)     | 164.95 | 0.00 | 324.55 | 146.42  |
| Terpene index (TI) | 0.31   | 0.00 | 0.72   | 0.87    |

**Table S5.** The OAV of volatile components in SDT and WDT.

| No. | Volatile Compounds               | Oder Description                                 | Oder Type | Odor Threshold (ng/g) | OAV          |              |
|-----|----------------------------------|--------------------------------------------------|-----------|-----------------------|--------------|--------------|
|     |                                  |                                                  |           |                       | SDT          | WDT          |
| 1   | ( <i>Z</i> )- $\beta$ -Farnesene | Floral, citrus <sup>1</sup>                      | Floral    | 87 <sup>a</sup>       | 1.25±0.17    | 3.07±0.50    |
| 2   | Linalool oxide I                 | Sweet, floral, creamy <sup>2</sup>               | Floral    | 60 <sup>b</sup>       | 6.26±0.97    | 3.18±0.37    |
| 3   | Linalool oxide II                | Sweet, floral, creamy <sup>2</sup>               | Floral    | 100 <sup>b</sup>      | 0.96±0.17    | 0.82±0.08    |
| 4   | Hotrienol                        | Fresh, floral, fruity <sup>1</sup>               | Floral    | 110 <sup>a</sup>      | 2.57±0.43    | 7.03±0.57    |
| 5   | Geraniol                         | Rose-like, sweet, honey-like <sup>1</sup>        | Floral    | 7.5 <sup>a</sup>      | 43.27±7.33   | 19.52±0.00   |
| 6   | Indole                           | Flora <sup>1</sup>                               | Floral    | 40 <sup>a</sup>       | 75.51±8.96   | 136.34±10.74 |
| 7   | ( <i>Z</i> )-Jasmone             | Sweet, floral <sup>1</sup>                       | Floral    | 7 <sup>a</sup>        | 67.08±9.89   | 104.83±12.56 |
| 8   | $\alpha$ -Ionone                 | Floral, violet, powdery, berry-like <sup>1</sup> | Floral    | 76 <sup>a</sup>       | 1.59±0.24    | 0.28±0.04    |
| 9   | ( <i>E</i> )-Nerolidol           | Floral, green, citrus, waxy <sup>2</sup>         | Floral    | 10 <sup>c</sup>       | 219.08±35.33 | 427.05±71.72 |

Table S5. (continue)

| No. | Volatile Compounds                 | Oder Description                                         | Oder Type | Odor Threshold (ng/g) | OAV               |                    |
|-----|------------------------------------|----------------------------------------------------------|-----------|-----------------------|-------------------|--------------------|
|     |                                    |                                                          |           |                       | SDT               | WDT                |
| 10  | ( <i>E, E</i> )-Farnesol           | Floral, sweet, lily-like, muguet-like <sup>1</sup>       | Floral    | 1,000 <sup>a</sup>    | 0.02±0.00         | 0.02±0.01          |
| 11  | Phytol                             | Floral <sup>2</sup>                                      | Floral    | 640 <sup>a</sup>      | 0.44±0.08         | 0.05±0.02          |
| 12  | Isophytol                          | Floral, herbal, green <sup>2</sup>                       | Floral    | 640 <sup>a</sup>      | 10.09±3.53        | —                  |
| 13  | Benzeneacetaldehyde                | Floral, rose <sup>1</sup>                                | Floral    | 4 <sup>a</sup>        | 77.91±13.58       | 57.94±11.06        |
| 14  | $\beta$ -Phenylethyl butyrate      | Sweet, floral <sup>1</sup>                               | Floral    | 376 <sup>a</sup>      | 0.16±0.03         | 0.52±0.12          |
| 15  | Methyl jasmonate                   | Jasmine-like, floral <sup>1</sup>                        | Floral    | 3 <sup>a</sup>        | 28.61±4.31        | 166.08±17.27       |
| 16  | ( <i>Z</i> )-3-Hexenyl salicylate  | Floral <sup>1</sup>                                      | Floral    | 1,159 <sup>a</sup>    | 0.08±0.02         | —                  |
| 17  | Linalool                           | Sweet, floral <sup>1</sup>                               | Floral    | 0.22 <sup>a</sup>     | 3887.77±660.68    | 4616.14±762.64     |
| 18  | <i>trans</i> - $\beta$ -Ionone     | Violet, raspberry, flora <sup>1</sup>                    | Floral    | 0.01 <sup>a</sup>     | 48,204.00±7662.00 | 25,580.00±4925.00  |
| 19  | 6,10-Dimethyl-5,9-undecadien-2-one | Floral, rose-like <sup>1</sup>                           | Floral    | 0.06 <sup>b</sup>     | 3688.17±687.33    | —                  |
| 20  | Jasmine lactone                    | Fruity <sup>1</sup>                                      | Fruity    | 300 <sup>c</sup>      | 4.81±0.70         | —                  |
| 21  | Benzyl alcohol                     | Fruity, rose-like <sup>1</sup>                           | Fruity    | 20,000 <sup>a</sup>   | 0.01±0.00         | 0.01±0.00          |
| 22  | Methyl anthranilate                | Fruity, concord grape <sup>1</sup>                       | Fruity    | 3 <sup>a</sup>        | 64.88±11.43       | 25.25±21.67        |
| 23  | Methyl salicylate                  | Peppermint, wintergreen mint <sup>1</sup>                | Green     | 40 <sup>a</sup>       | 6.81±1.14         | 3.00±0.54          |
| 24  | ( <i>E, E</i> )-2,4-Nonadienal     | green <sup>1</sup>                                       | Green     | 0.09 <sup>c</sup>     | 449.78±145.56     | —                  |
| 25  | Decanal                            | Sweet, citrus, green <sup>1</sup>                        | Green     | 0.1 <sup>d</sup>      | 2723.10±776.30    | 1771.40±572.10     |
| 26  | Benzaldehyde                       | Caramel, fruity, bitter almond, burnt sugar <sup>1</sup> | Roasted   | 350 <sup>a</sup>      | 0.36±0.06         | 0.45±0.04          |
| 27  | $\beta$ -Cyclocitral               | Green <sup>1</sup>                                       | Woody     | 3 <sup>a</sup>        | —                 | 26.97±5.57         |
| 28  | Caryophyllene                      | Woody, green, spicy, terpenic <sup>1</sup>               | Woody     | 64 <sup>a</sup>       | 0.78±0.13         | 0.70±0.22          |
| 29  | Cedrol                             | Woody, floral <sup>2</sup>                               | Woody     | 0.5 <sup>c</sup>      | 46.38±7.66        | 56.76±10.22        |
| 30  | $\alpha$ -Muurolene                | Woody <sup>2</sup>                                       | Woody     | 0.1 <sup>b</sup>      | 439.50±65.80      | 33,902.70±2,223.10 |
| 31  | ( <i>E, E</i> )-2,4-Heptadienal    | Fatty, green, oily, cinnamon-like <sup>1</sup>           | Chemical  | 0.032 <sup>c</sup>    | 4933.44±672.19    | 3410.94±404.06     |

<sup>1</sup> References for odor description citations [1].<sup>2</sup> References for odor description citations [2].<sup>a</sup> References for threshold values of volatile compounds citations [2].<sup>b</sup> References for threshold values of volatile compounds citations [2].<sup>c</sup> References for threshold values of volatile compounds citations [3].

<sup>d</sup> References for threshold values of volatile compounds citations [4].

<sup>e</sup> References for threshold values of volatile compounds citations [5].



## References

1. Guo, X.; Ho, C.; Wan, X.; Zhu, H.; Liu, Q.; Wen, Z. Changes of volatile compounds and odor profiles in Wuyi rock tea during processing. *Food Chem.* **2021**, 341, 128230.
2. Guo, X.; Ho, C.; Schwab, W.; Wan, X. Effect of the roasting degree on flavor quality of large-leaf yellow tea. *Food Chem.* **2021**, 347, 129016.
3. Zhai, X.; Zhang, L.; Granvogl, M.; Ho, C.; Wan, X. Flavor of tea (*Camellia sinensis*): A review on odorants and analytical techniques. *Compr. Rev. Food. Sci. Food Saf.* **2022**, 21, 3867-3909.
4. Wen, Y.; He, F.; Zhu, B.; Lan, Y.; Pan, Q.; Li, C.; Reeves, M.J.; Wang, J. Free and glycosidically bound aroma compounds in cherry (*Prunus avium* L.). *Food Chem.* **2014**, 152, 29-36.
5. Wang, M.; Ma, W.; Shi, J.; Zhu, Y.; Lin, Z.; Lv, H. Characterization of the key aroma compounds in Longjing tea using stir bar sorptive extraction (SBSE) combined with gas chromatography-mass spectrometry (GC-MS), gas chromatography-olfactometry (GC-O), odor activity value (OAV), and aroma recombination. *Food Res. Int.* **2020**, 130, 108908.
